# Supplementary material
Source: Springer Nature journal article supplement (https://www.springermedizin.de/resource/supplementary/13048_2013_261_MOESM3_ESM.pdf/9665238)

**A**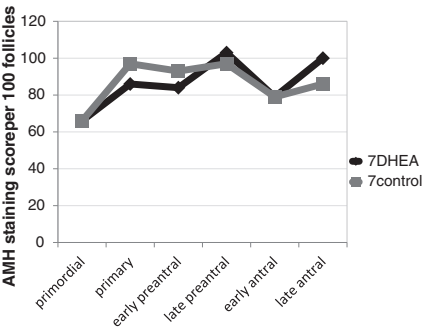**B**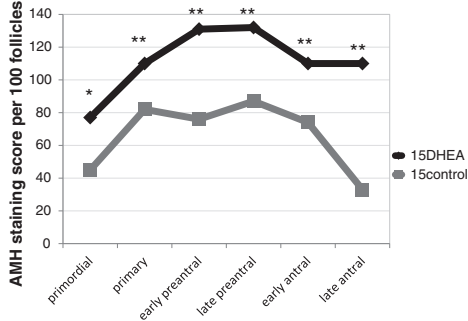**C**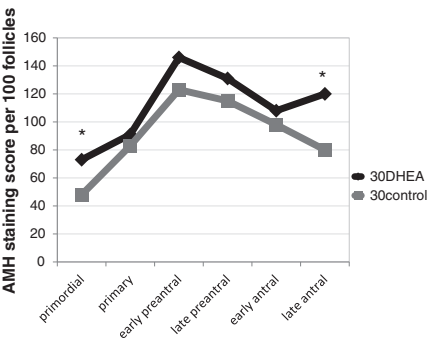**D**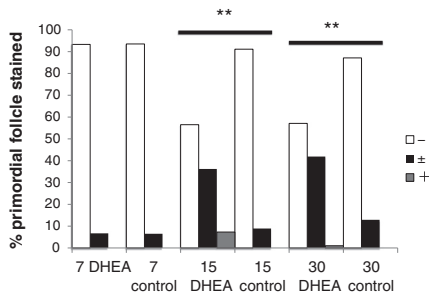

Supplement: MOESM3 [file 9665238]
